# Supplementary material for: Prostate-specific loss of UXT promotes cancer progression
Source: PubMed Central journal article supplement (PMC6366831; doi:10.18632/oncotarget.26573), 2019-01-22
Supplement: oncotarget-10-707-s001.pdf [file oncotarget-10-707-s001.pdf]

## Prostate-specific loss of UXT promotes cancer progression

### SUPPLEMENTARY MATERIALS

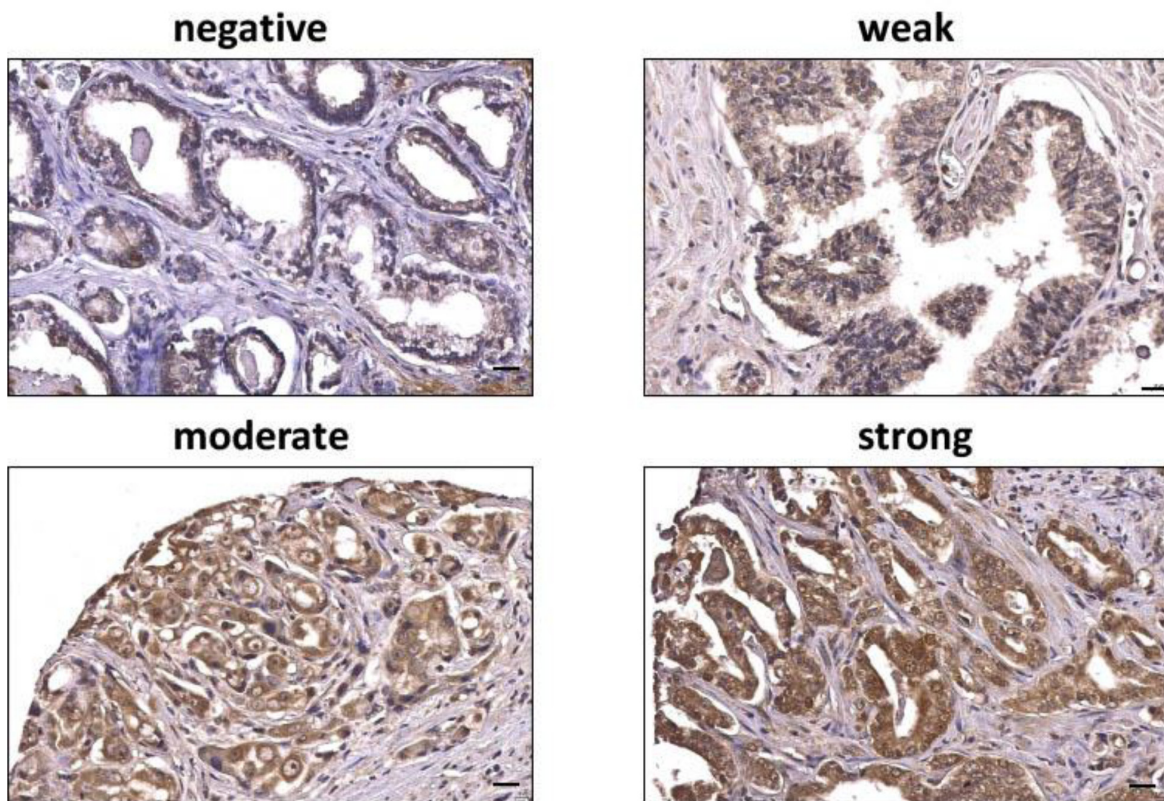

**Supplementary Figure 1: UXT expression levels in human prostate.** Human prostate specimens from PCBN were subjected to IHC analysis with rabbit anti-human UXT antibody. UXT expression level was categorized as negative, weak, moderate, or strong.

**Supplementary Table 1: Clinicopathologic characteristics of overall cohort**

|                          | Mean (Std. Dev.) | 60.5 ± 7.1  |
|--------------------------|------------------|-------------|
| Age (y)                  | Mean (Std. Dev.) | 6.8 ± 6.0   |
| PSA at diagnosis (ng/mL) | T1               | 127 (62.3%) |
|                          | T2               | 33 (16.2%)  |
|                          | Tx/Unknown       | 44 (21.5%)  |
| Pathological T Stage     | pT2              | 138 (67.6%) |
|                          | pT3              | 65 (31.9%)  |
|                          | Gleason Sum      | 5           |
| Surgical Margins         | 6                | 68 (33.3%)  |
|                          | 7                | 108 (52.8%) |
|                          | 8                | 8 (3.9%)    |
|                          | 9                | 18 (8.8%)   |
|                          | Negative         | 171 (83.8%) |
| Extension                | Positive         | 33 (16.2%)  |
|                          | Negative         | 198 (97.1%) |
| SVI                      | Positive         | 6 (2.9%)    |
|                          | Negative         | 186 (91.2%) |
| Outcome (%)              | Positive         | 18 (8.8%)   |
|                          | Nil Relapse      | 164 (80.4%) |
|                          | Relapse          | 38 (18.6%)  |
| Length of Follow-up      | Lost Follow-up   | 2 (1.0%)    |
|                          | Mean (months)    | 82          |
| Period Disease Free      | Mean (months)    | 31          |
| Race                     | African-American | 5           |
|                          | Asian            | 5           |
|                          | Other            | 7           |
|                          | Caucasian        | 176         |
|                          | Unknown          | 8           |

**Supplementary Table 2: Mouse prostate pathological changes**

| Age (months) | <i>Uxt<sup>Flox/Y</sup></i> | <i>Uxt<sup>Flox/Y</sup>, Cre</i> |
|--------------|-----------------------------|----------------------------------|
| 4-6          | 0/7                         | 6/8                              |
| 12           | 1/5                         | 6/6                              |
| Total        | 1/12                        | 12/14                            |
